# Supplementary material for: Fabrication of an anodized nanoporous aluminium (AAO/Al) transparent electrode as an ITO alternative for PDLC smart windows
Source: Royal Society of Chemistry journal article supplement (doi:10.1039/d2ma01007k), 2023-01-01
Supplement: d2ma01007k1.pdf [file d2ma01007k1.pdf]

## **Electronic Supplementary Information**

### **Fabrication of anodized nanoporous aluminium (AAO/Al) transparent electrode as ITO alternative for PDLC smart windows**

Rahuldeb Roy,<sup>a,b</sup> Indrajit Mondal<sup>c</sup> and Ashutosh K Singh<sup>\*,a,b</sup>

<sup>a</sup> *Centre for Nano and Soft Matter Sciences, Bangalore 562162, India.*

<sup>b</sup> *Manipal Academy of Higher Education, Manipal 576104, Karnataka, India.*

<sup>c</sup> *Chemistry & Physics of Materials Unit, Jawaharlal Nehru Centre for Advanced Scientific Research, Bangalore 560064, India.*

\*Corresponding author

E-mail addresses: Dr. Ashutosh K Singh (ashuvishen@gmail.com, aksingh@cens.res.in)

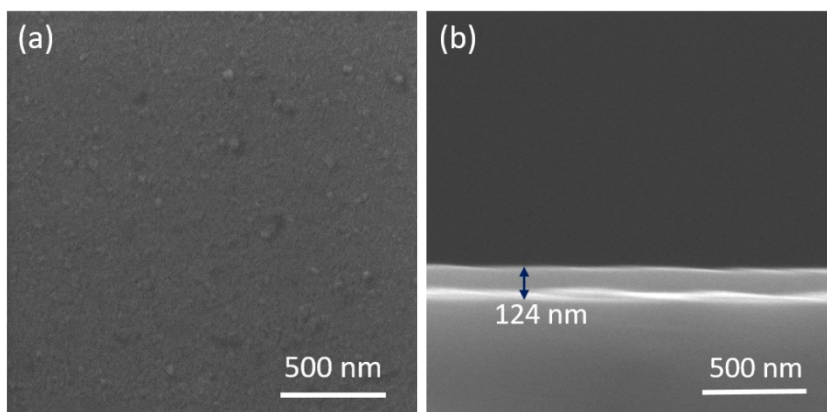

**Fig. S1** (a) The FESEM image of as deposited Aluminium film. (b) cross sectional image of the as deposited Aluminium film.

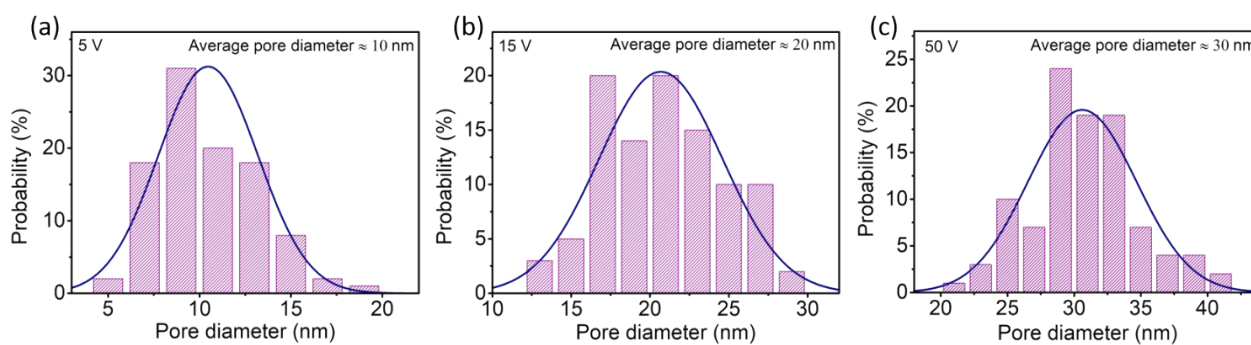

**Fig. S2** Pore diameter distribution at different anodization voltage (a) 5V (b) 15 V (c) 50 V.

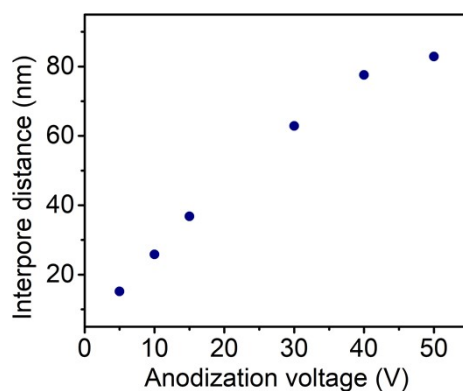

**Fig. S3** Interpore distance vs anodization voltages.

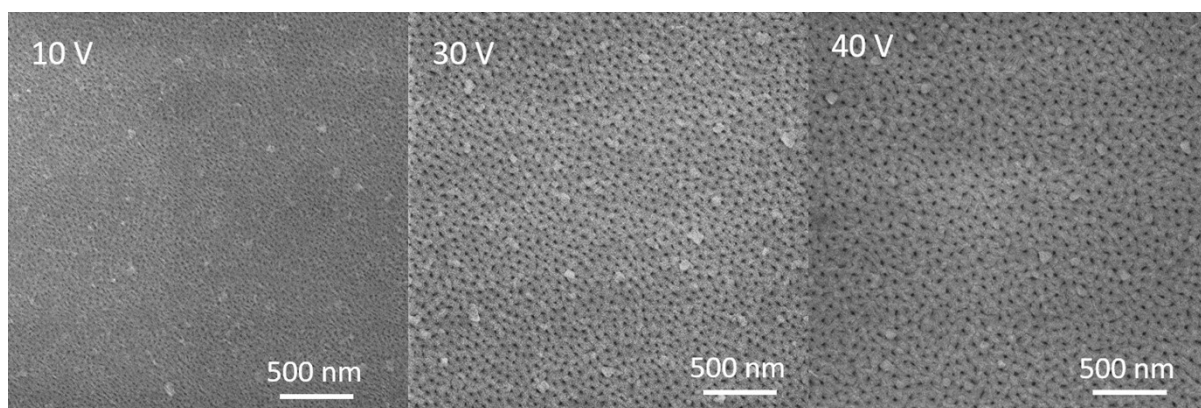

**Fig. S4** FESEM images of the anodized nanoporous aluminium electrodes at different anodization voltages (a) 10 V (b) 30 V (c) 40 V.

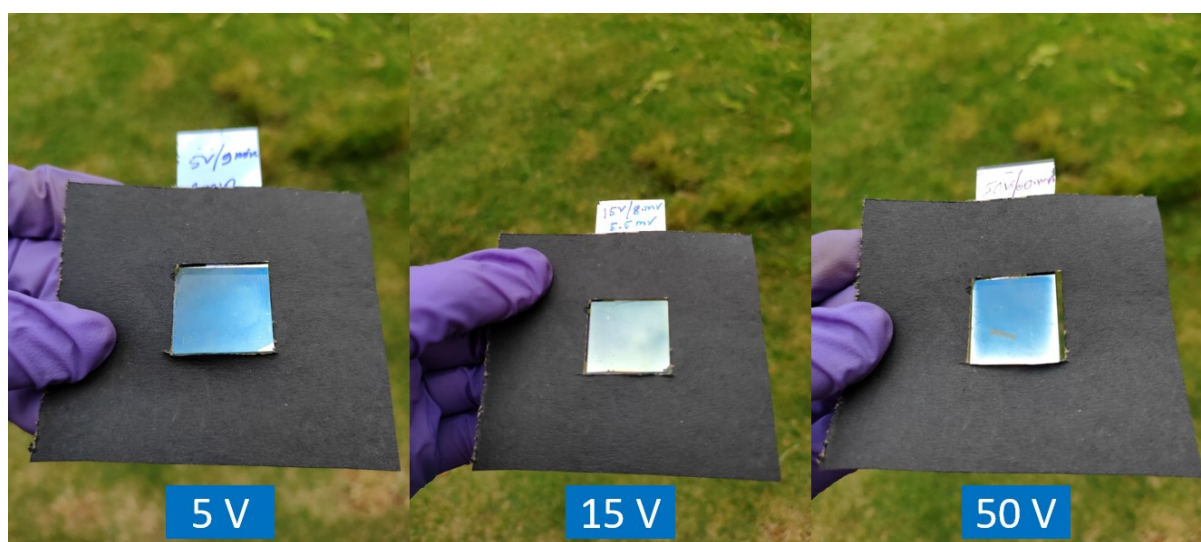

**Fig. S5** Photographs of the anodized AAO/Al electrodes to capture the reflection from the electrode surface.

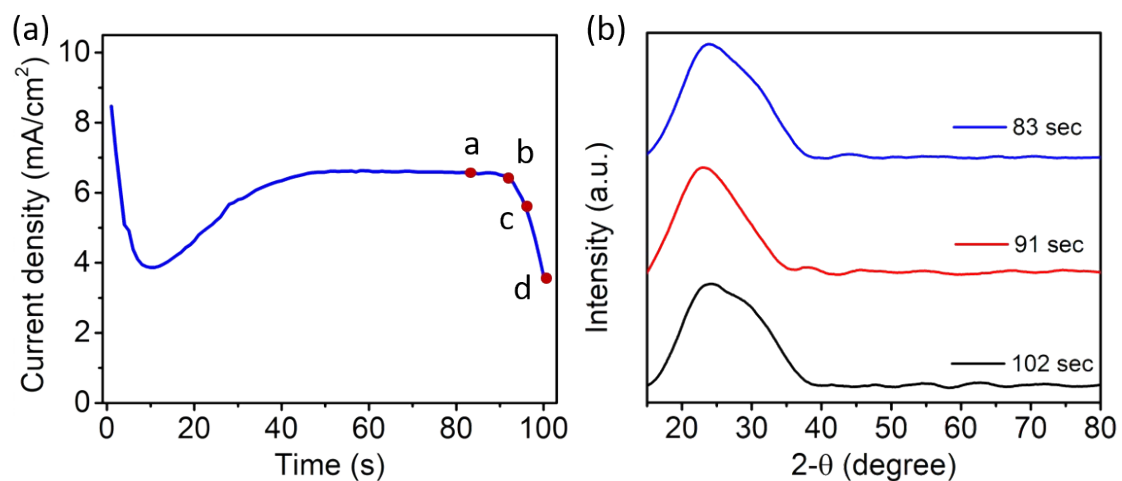

**Fig. S6** (a) Current vs Time response for the anodization voltage 15 V. Points a, b, c, d corresponds to the anodization time of 83 sec, 91 sec, 96 sec and 102 sec, respectively. (b) XRD pattern of the anodized nanoporous films at anodization time 83 sec, 91 sec and 102 sec.

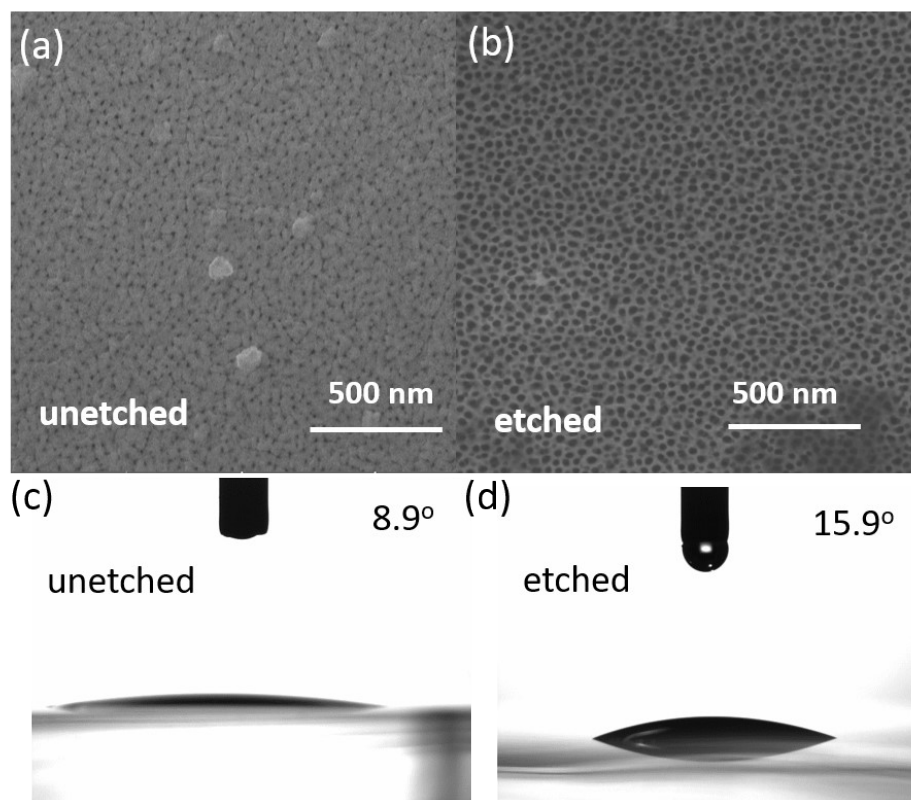

**Fig. S7** FESEM images of the nanoporous Al electrodes at 15 V anodization voltage with unetched (a), etched (b). Water contact angle measurements (WCA) for the (c) unetched, (d) etched.

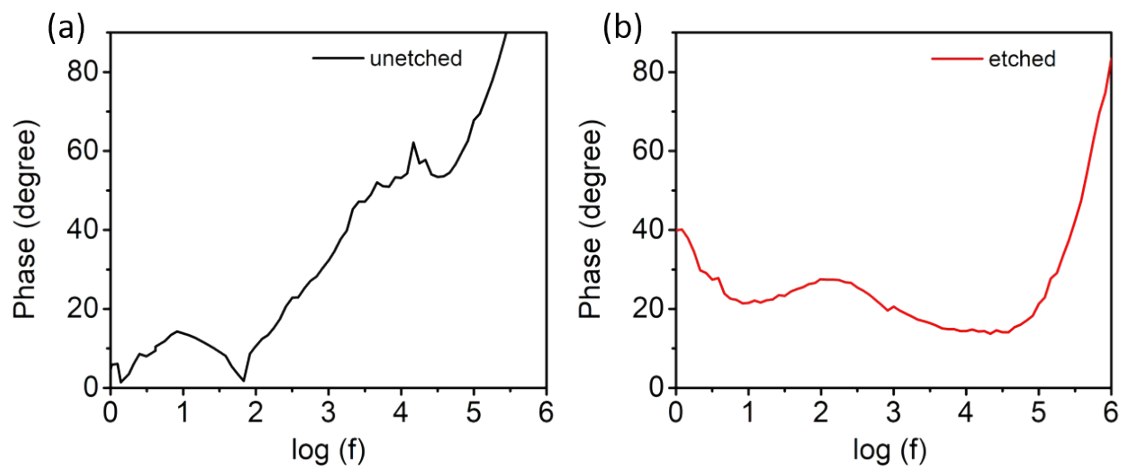

**Fig. S8** Bode plot of the electrochemical impedance spectroscopy data for the nanoporous AAO/Al electrodes. (a) Change in phase angle with the change in frequency for unetched electrode, (b) change in phase angle with the change in frequency for etched electrode.

**Table S1 Comparison of present work parameters with existing literature**

| <b>Material</b>                                 | <b>Method</b>            | <b>Sheet Resistance<br/>(<math>\Omega/\square</math>)</b> | <b>Transmittance<br/>(%)</b> | <b>Reference</b> |
|-------------------------------------------------|--------------------------|-----------------------------------------------------------|------------------------------|------------------|
| Al metal nanomesh                               | Lithography              | Na                                                        | 55                           | [1]              |
| SnO <sub>2</sub>                                | Spray pyrolysis          | 38.2                                                      | 80                           | [2]              |
| Single wall carbon nanotube                     | CVD                      | 6K                                                        | 88                           | [3]              |
| In <sub>4</sub> Sn <sub>3</sub> O <sub>12</sub> | DC magnetron sputtering  | 400                                                       | 80                           | [4]              |
| PEDOT/PSS                                       | Chemical process         | 400                                                       | 86.5                         | [5]              |
| RGO-SWCNT                                       | Solution process         | 254                                                       | 58                           | [6]              |
| Cu nanowire                                     | Solution process         | 100                                                       | 95                           | [7]              |
| Graphene                                        | Solution process         | 800                                                       | 82                           | [8]              |
| ITO                                             | RF sputtering            | 73.2                                                      | 94                           | [9]              |
| Graphene                                        | CVD                      | 219                                                       | 96                           | [10]             |
| PANI                                            | Spin coating             | 1.3K                                                      | 72                           | [11]             |
| Anodized nanoporous aluminium (AAO/Al)          | Electrochemical one step | 128                                                       | 70                           | This Work        |

## References:

- 1 T. Nakanishi, E. Tsutsumi, K. Masunaga, A. Fujimoto and K. Asakawa, *Appl. Phys. Express*, 2011, **4**, 2–5.
- 2 E. Elangovan, M. P. Singh, M. S. Dharmaprasanth and K. Ramamurthi, *J. Optoelectron. Adv. Mater.*, 2004, **6**, 197–203.
- 3 X. Yu, R. Rajamani, K. A. Stelson and T. Cui, *J. Nanosci. Nanotechnol.*, 2006, **6**, 1939–1944.
- 4 T. Minami, Y. Takeda, S. Takata and T. Kakumu, *Thin Solid Films*, 1997, **308–309**, 13–18.
- 5 M. Nishii, R. Sakurai, K. Sugie, Y. Masuda and R. Hattori, *SID Symp. Dig. Tech. Pap.*, 2009, **40**, 768.
- 6 J. H. Huang, J. H. Fang, C. C. Liu and C. W. Chu, *ACS Nano*, 2011, **5**, 6262–6271.
- 7 S. Ye, A. R. Rathmell, I. E. Stewart, Y. C. Ha, A. R. Wilson, Z. Chen and B. J. Wiley, *Chem. Commun.*, 2014, **50**, 2562–2564.
- 8 J. Wu, M. Agrawal, H. A. Becerril, Z. Bao, Z. Liu, Y. Chen and P. Peumans, *ACS Nano*, 2010, **4**, 43–48.
- 9 M. J. Kim, J. H. Park, D. S. Jeon, T. H. Lee and T. G. Kim, *2015 11th Conf. Lasers Electro-Optics Pacific Rim, CLEO-PR 2015*, 2016, **2**, 7–8.
- 10 C. Cai, F. Jia, A. Li, F. Huang, Z. Xu, L. Qiu, Y. Chen, G. Fei and M. Wang, *Carbon N. Y.*, 2016, **98**, 457–462.
- 11 S. S. Jeon, C. Kim, T. H. Lee, Y. W. Lee, K. Do, J. Ko and S. S. Im, *J. Phys. Chem. C*, 2012, **116**, 22743–22748.
